# Supplementary material for: Increased Fibroblast Metabolic Activity of Collagen Scaffolds via the Addition of Propolis Nanoparticles
Source: PubMed Central journal article supplement (PMC7412245; doi:10.3390/ma13143118), 2020-07-13
Supplement: materials-13-03118-s001.pdf [file materials-13-03118-s001.pdf]

Supplementary Information

# Increased Fibroblast Metabolic Activity of Collagen Scaffolds via the Addition of Propolis Nanoparticles

Jeimmy González-Masís <sup>1</sup>, Jorge M. Cubero-Sesin <sup>1</sup>, Yendry R. Corrales-Ureña <sup>2</sup>, Sara González-Camacho <sup>3</sup>, Nohelia Mora-Ugalde <sup>4</sup>, Mónica Baizán-Rojas <sup>4</sup>, Randall Loaiza <sup>4</sup>, José Roberto Vega-Baudrit <sup>2,5</sup> and Rodolfo J. Gonzalez-Paz <sup>2,\*</sup>

<sup>1</sup> Centro de Investigación y Extensión en Materiales, Escuela de Ciencia e Ingeniería de los Materiales, Instituto Tecnológico de Costa Rica, 159-7050 Cartago, Costa Rica; jeimmygonz@gmail.com (J.G.-M.); jorgecubero@gmail.com (J.M.C.-S.)

<sup>2</sup> Adolphe Merkle Institute, University of Fribourg, Chemin des Verdiers 4, 1700 Fribourg, Switzerland; yendry386@hotmail.com (Y.R.C.-U.); jvegab@gmail.com (J.R.V.-B.)

<sup>3</sup> Biological Assay Laboratory (LEBi), Universidad de Costa Rica, 11501-2060 San José, Costa Rica; sara.gonzalez@ucr.ac.cr

<sup>4</sup> National Center for Biotechnological Innovations (CENIBiot), National Center of High Technology (CeNAT-CONARE), Pavas, 1174-1200 San José, Costa Rica; none.0512@gmail.com (N.M.-U.); mbaizan@cenat.ac.cr (M.B.-R.); rloaiza@cenat.ac.cr (R.L.)

<sup>5</sup> National Laboratory of Nanotechnology (LANOTEC), National Center of High Technology (LANOTEC-CeNAT-CONARE), Pavas, 1174-1200 San José, Costa Rica

<sup>6</sup> Laboratorio de Polímeros (POLIUNA), Universidad Nacional, 86-3000 Heredia, Costa Rica

\* Correspondence: osarsip@gmail.com

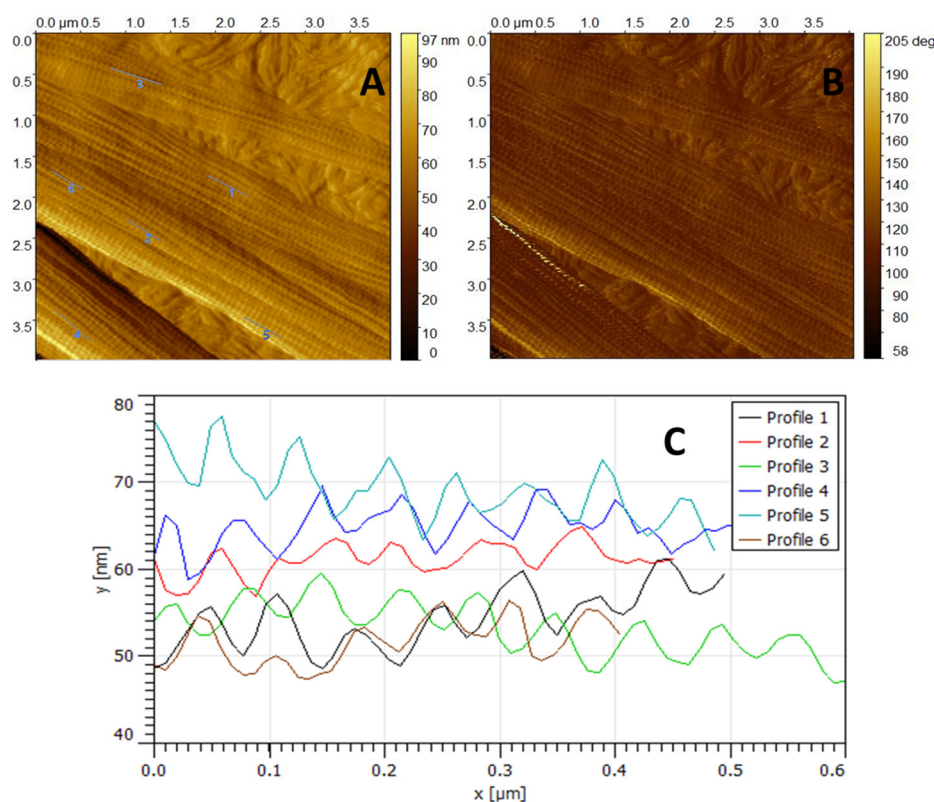

**Figure S1.** AFM (A) amplitude, (B) phase image of the collagen control sample. (C) Cross-section of the line profile shown in A. The collagen D-pattern gap is similar in all the microfibers measured and all the microfibers show a homogeneous phase.

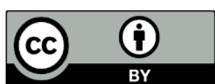

© 2020 by the authors. Licensee MDPI, Basel, Switzerland. This article is an open access article distributed under the terms and conditions of the Creative Commons Attribution (CC BY) license (<http://creativecommons.org/licenses/by/4.0/>).
